# Supplementary material for: N6-methyladenosine-related Genomic Targets are Altered in Breast Cancer Tissue and Associated with Poor Survival
Source: PubMed Central journal article supplement (PMC6775703; doi:10.7150/jca.35053), 2019-08-29
Supplement: jcav10p5447s1.pdf [file jcav10p5447s1.pdf]

**Supplementary Table.** Information on antibodies used in this study

|                       | <b>Antibody</b> | <b>IHC</b> | <b>IF</b> | <b>Specificity</b>   | <b>Company</b>           |
|-----------------------|-----------------|------------|-----------|----------------------|--------------------------|
| <b>M6A<br/>writer</b> | WTAP            | 1:500      | 1:200     | Mouse<br>Monoclonal  | Proteintech Group, China |
|                       | KIAA1429        | 1:200      | 1:200     | Rabbit<br>Polyclonal | Proteintech Group, China |
|                       | RBM15           | 1:500      | 1:200     | Rabbit<br>Polyclonal | Proteintech Group, China |
|                       | RBM15B          | 1:200      | 1:200     | Rabbit<br>Polyclonal | Proteintech Group, China |
|                       | METTL3          | 1:200      | 1:200     | Rabbit<br>Polyclonal | Proteintech Group, China |
|                       | METTL14         | 1:200      | 1:200     | Rabbit<br>Polyclonal | Proteintech Group, China |
|                       | METTL16         | 1:200      | 1:200     | Rabbit<br>Polyclonal | Proteintech Group, China |
| <b>M6A<br/>eraser</b> | ALKBH5          | 1:500      | 1:200     | Rabbit<br>Polyclonal | Proteintech Group, China |
|                       | FTO             | 1:200      | 1:200     | Rabbit<br>Polyclonal | Proteintech Group, China |
| <b>M6A<br/>reader</b> | YTHDC1          | 1:200      | 1:200     | Rabbit<br>Polyclonal | Proteintech Group, China |
|                       | YTHDF1          | 1:200      | 1:200     | Rabbit<br>Polyclonal | Proteintech Group, China |
|                       | YTHDF2          | 1:200      | 1:200     | Rabbit<br>Polyclonal | Proteintech Group, China |
|                       | YTHDF3          | 1:200      | 1:200     | Rabbit<br>Polyclonal | Proteintech Group, China |
|                       | HNRNPA2B1       | 1:500      | 1:200     | Rabbit<br>Polyclonal | Proteintech Group, China |
|                       | HNRNPC          | 1:200      | 1:200     | Rabbit<br>Polyclonal | Proteintech Group, China |
